# Supplementary material
Source: PubMed Central journal article supplement (PMC3485728)
Supplement: AEM.02036-12_zam999103786so1.pdf [file AEM.02036-12_zam999103786so1.pdf]

1 **SUPPLEMENTARY MATERIAL**

2 for

3 Next-generation sequencing of microbial communities in the Athabasca River  
4 and its tributaries in relation to oil sands mining activities

5  
6  
7 Etienne Yergeau<sup>1</sup>, John R. Lawrence<sup>2</sup>, Sylvie Sanschagrin<sup>1</sup>, Marley J. Waiser<sup>2</sup>, Darren R.  
8 Korber<sup>3</sup> and Charles W. Greer<sup>1</sup>

9  
10 <sup>1</sup>National Research Council Canada, Montreal, Quebec, Canada

11 <sup>2</sup>Environment Canada, Saskatoon, Saskatchewan, Canada

12 <sup>3</sup>University of Saskatchewan, Saskatoon, Saskatchewan, Canada

Figure S1. Principal coordinate analyses (PCoA) based on Unifrac distances for 454 and Ion Torrent bacterial datasets. AR, Athabasca reference site; NSM, Northland sawmill; DSU, downstream Suncor; MSK, Muskeg River; AER, mouth of Ells River; EU, EM, EL: upper, mid and lower Ells River; FU, FM, FL: upper, mid and lower Firebag Creek; SU, SM, SL: upper, mid and lower Steepbank Creek; SY1A, SY1B, Syncrude tailings ponds; SU3: Suncor tailings pond.

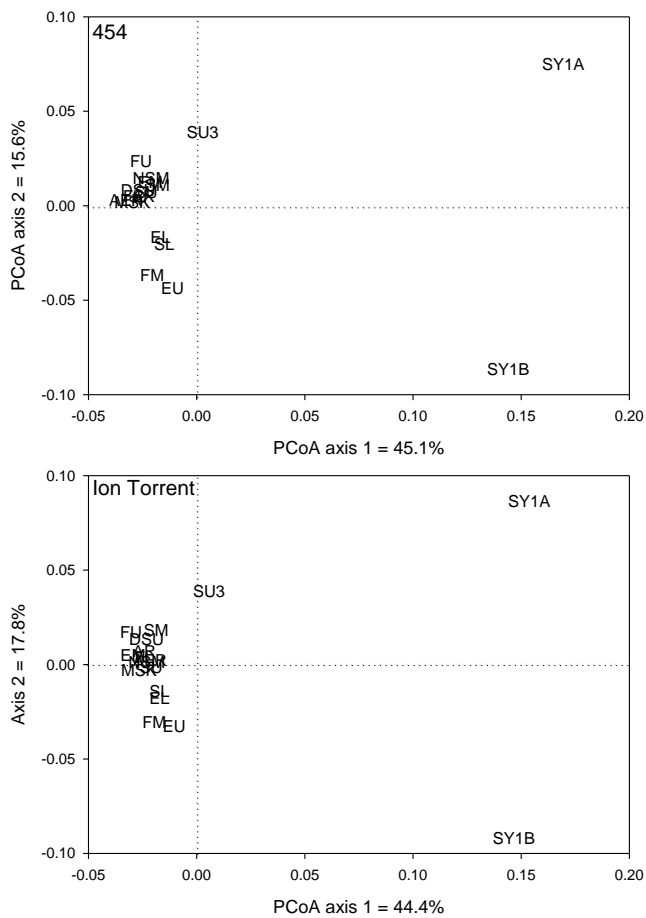

Figure S2. Principal coordinate analyses (PCoA) based on Unifrac distances for Ion Torrent bacterial datasets. Refer to the legend of Figure S1 for sample abbreviations.

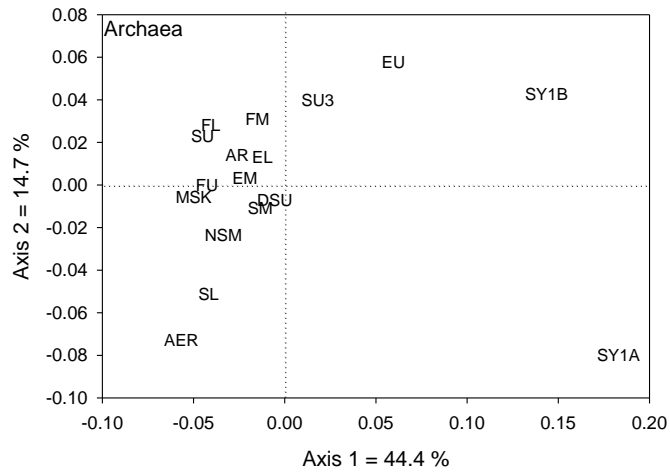

Table S1: Multiplex identifiers used in this study

| <i>Sample</i>           | <i>MID</i> | <i>Sequence</i> |
|-------------------------|------------|-----------------|
| <i>454</i>              |            |                 |
| EU                      | MID-1      | ACGAGTGCGT      |
| EM                      | MID-2      | ACGCTCGACA      |
| EL                      | MID-3      | AGACGCACTC      |
| FU                      | MID-4      | AGCACTGTAG      |
| FM                      | MID-21     | CGTAGACTAG      |
| FL                      | MID-22     | TACGAGTATG      |
| SU                      | MID-7      | CGTGTCTCTA      |
| SM                      | MID-8      | CTCGCGTGTC      |
| SL                      | MID-10     | TCTCTATGCG      |
| AR                      | MID-11     | TGATACGTCT      |
| MSK                     | MID-13     | CATAGTAGTG      |
| SU3                     | MID-15     | ATACGACGTA      |
| NSM                     | MID-16     | TCACGTACTA      |
| SY1A                    | MID-17     | CGTCTAGTAC      |
| SY1B                    | MID-18     | TCTACGTAGC      |
| DSU                     | MID-19     | TGTACTACTC      |
| AER                     | MID-20     | ACGACTACAG      |
| <i>Ion</i>              |            |                 |
| <i>Torrent</i>          |            |                 |
| EU                      | MID-1      | CTAAGGTAAC      |
| EM                      | MID-2      | TAAGGAGAAC      |
| EL                      | MID-3      | AAGAGGATTC      |
| FU                      | MID-4      | TACCAAGATC      |
| FM                      | MID-5      | CAGAAGGAAC      |
| FL                      | MID-6      | CTGCAAGTTC      |
| SU                      | MID-7      | TTCGTGATTC      |
| SM                      | MID-8      | TTCCGATAAC      |
| SL                      | MID-9      | TGAGCGGAAC      |
| AR                      | MID-10     | CTGACCGAAC      |
| MSK                     | MID-11     | TCCTCGAATC      |
| SU3                     | MID-12     | TAGGTGGTTC      |
| NSM                     | MID-13     | TCTAACGGAC      |
| SY1A                    | MID-14     | TTGGAGTGTC      |
| SY1B                    | MID-15     | TCTAGAGGTC      |
| DSU                     | MID-16     | TCTGGATGAC      |
| AER                     | MID-17     | TACTCACGAT      |
| <i>Positive control</i> | MID-18     | TCGTGTCGCA      |

15 Supplementary Table S2: Number of classified sequences for all the bacterial and *Archaea* phyla (and *Proteobacteria* classes)

16 detected (derived from 454 sequencing for *Bacteria* and from Ion Torrent sequencing for *Archaea*)

| Taxa                         | AER   | NSM   | DSU   | MSK   | AR    | SU    | SM    | SL    | EU    | EM    | EL    | FU    | FM    | FL    | SU3   | SY1A  | SY1B  |
|------------------------------|-------|-------|-------|-------|-------|-------|-------|-------|-------|-------|-------|-------|-------|-------|-------|-------|-------|
| <b><i>Bacteria</i></b>       |       |       |       |       |       |       |       |       |       |       |       |       |       |       |       |       |       |
| Total classified reads       | 23939 | 21657 | 31332 | 21506 | 22552 | 25949 | 30974 | 24285 | 32868 | 28166 | 34324 | 25399 | 30696 | 26442 | 28816 | 25188 | 26442 |
| <i>Acidobacteria</i>         | 1308  | 429   | 1219  | 724   | 1202  | 1739  | 1025  | 979   | 607   | 676   | 911   | 818   | 2004  | 1303  | 449   | 0     | 5     |
| <i>Actinobacteria</i>        | 744   | 336   | 998   | 404   | 556   | 1905  | 1103  | 844   | 579   | 316   | 749   | 494   | 903   | 708   | 669   | 124   | 103   |
| <i>Bacteroidetes</i>         | 2950  | 4009  | 3521  | 4594  | 3612  | 1525  | 6801  | 5365  | 5678  | 5155  | 8338  | 2498  | 6862  | 1915  | 4211  | 860   | 1894  |
| <i>BRC1</i>                  | 2     | 1     | 3     | 5     | 2     | 1     | 0     | 0     | 0     | 3     | 6     | 0     | 23    | 0     | 1     | 0     | 0     |
| <i>Caldiserica</i>           | 0     | 0     | 0     | 0     | 0     | 1     | 0     | 0     | 1     | 0     | 0     | 0     | 1     | 1     | 2     | 0     | 7     |
| <i>Chlamydiae</i>            | 0     | 0     | 0     | 0     | 0     | 0     | 0     | 0     | 1     | 0     | 0     | 0     | 0     | 0     | 0     | 0     | 0     |
| <i>Chlorobi</i>              | 14    | 5     | 12    | 18    | 19    | 6     | 1     | 1     | 2     | 3     | 11    | 1     | 9     | 2     | 5     | 0     | 0     |
| <i>Chloroflexi</i>           | 2605  | 1769  | 1670  | 1867  | 2056  | 2393  | 1506  | 1120  | 1351  | 1795  | 3357  | 1610  | 559   | 718   | 1101  | 139   | 654   |
| <i>Cyanobacteria</i>         | 883   | 3395  | 2883  | 2230  | 878   | 152   | 544   | 132   | 2159  | 5267  | 646   | 6267  | 111   | 4443  | 1327  | 1     | 0     |
| <i>Deferribacteres</i>       | 5     | 1     | 2     | 3     | 2     | 0     | 1     | 1     | 1     | 0     | 3     | 1     | 0     | 0     | 5     | 0     | 14    |
| <i>Deinococcus-Thermus</i>   | 12    | 1     | 2     | 3     | 5     | 1     | 1     | 9     | 0     | 2     | 0     | 0     | 0     | 4     | 2     | 18    | 16    |
| <i>Fibrobacteres</i>         | 0     | 0     | 0     | 0     | 0     | 1     | 32    | 12    | 27    | 5     | 3     | 2     | 9     | 3     | 0     | 0     | 0     |
| <i>Firmicutes</i>            | 420   | 273   | 459   | 435   | 408   | 679   | 1150  | 3358  | 5310  | 387   | 2030  | 316   | 1632  | 595   | 391   | 265   | 2227  |
| <i>Fusobacteria</i>          | 7     | 0     | 0     | 1     | 0     | 0     | 0     | 6     | 9     | 7     | 11    | 10    | 31    | 36    | 0     | 0     | 0     |
| <i>Gemmatimonadetes</i>      | 193   | 101   | 242   | 118   | 149   | 124   | 197   | 110   | 74    | 190   | 124   | 104   | 372   | 240   | 84    | 0     | 0     |
| <i>Lentisphaerae</i>         | 5     | 8     | 32    | 3     | 1     | 2     | 1     | 0     | 15    | 32    | 9     | 1     | 20    | 12    | 6     | 10    | 5     |
| <i>Nitrospira</i>            | 106   | 38    | 352   | 78    | 173   | 325   | 99    | 65    | 24    | 54    | 46    | 392   | 365   | 295   | 24    | 1     | 1     |
| <i>OD1</i>                   | 11    | 15    | 62    | 31    | 38    | 16    | 11    | 15    | 9     | 23    | 34    | 9     | 19    | 32    | 50    | 3     | 89    |
| <i>OP10</i>                  | 55    | 8     | 35    | 37    | 45    | 30    | 14    | 16    | 25    | 17    | 18    | 35    | 137   | 29    | 14    | 0     | 4     |
| <i>OP11</i>                  | 0     | 0     | 0     | 0     | 0     | 0     | 0     | 1     | 0     | 0     | 0     | 0     | 0     | 0     | 0     | 1     | 1     |
| <i>Planctomycetes</i>        | 272   | 113   | 340   | 206   | 284   | 125   | 210   | 306   | 142   | 213   | 271   | 344   | 437   | 277   | 130   | 2     | 12    |
| <i>Proteobacteria</i>        | 8862  | 7664  | 14315 | 6408  | 8797  | 12085 | 14372 | 9303  | 13252 | 8714  | 12984 | 8729  | 11607 | 11827 | 16822 | 23303 | 16106 |
| <i>Epsilonproteobacteria</i> | 166   | 1351  | 38    | 29    | 77    | 125   | 191   | 7     | 704   | 156   | 704   | 58    | 619   | 417   | 637   | 569   | 995   |
| <i>Deltaproteobacteria</i>   | 2703  | 1883  | 3322  | 2075  | 2021  | 1560  | 3320  | 4699  | 5751  | 1275  | 3280  | 1610  | 1940  | 1820  | 1361  | 2033  | 6930  |
| <i>Betaproteobacteria</i>    | 2935  | 2285  | 5371  | 1619  | 3206  | 4378  | 4722  | 1789  | 3355  | 3249  | 5439  | 2874  | 2669  | 2730  | 7724  | 18739 | 7024  |
| <i>Alphaproteobacteria</i>   | 1353  | 747   | 2374  | 1429  | 1743  | 4198  | 2149  | 1452  | 1717  | 2272  | 1304  | 2250  | 3887  | 5062  | 3717  | 658   | 362   |
| <i>Gammaproteobacteria</i>   | 823   | 454   | 1689  | 605   | 974   | 1014  | 3216  | 697   | 746   | 820   | 1327  | 1141  | 1277  | 794   | 2187  | 1053  | 213   |

| Taxa                   | AER | NSM | DSU | MSK | AR  | SU  | SM  | SL  | EU  | EM   | EL  | FU  | FM  | FL  | SU3 | SY1A | SY1B |
|------------------------|-----|-----|-----|-----|-----|-----|-----|-----|-----|------|-----|-----|-----|-----|-----|------|------|
| <i>Spirochaetes</i>    | 144 | 55  | 57  | 105 | 75  | 7   | 19  | 10  | 19  | 68   | 41  | 28  | 403 | 25  | 89  | 7    | 149  |
| <i>SR1</i>             | 4   | 19  | 12  | 16  | 17  | 3   | 0   | 5   | 8   | 11   | 11  | 4   | 9   | 28  | 8   | 0    | 0    |
| <i>Synergistetes</i>   | 0   | 0   | 0   | 0   | 0   | 0   | 0   | 0   | 0   | 0    | 0   | 0   | 0   | 0   | 1   | 0    | 22   |
| <i>Tenericutes</i>     | 0   | 2   | 0   | 2   | 0   | 0   | 0   | 0   | 1   | 1    | 0   | 0   | 0   | 0   | 0   | 2    | 29   |
| <i>Thermotogae</i>     | 0   | 0   | 0   | 0   | 0   | 0   | 0   | 0   | 0   | 0    | 0   | 0   | 0   | 0   | 5   | 0    | 23   |
| <i>TM7</i>             | 19  | 24  | 84  | 52  | 47  | 52  | 82  | 53  | 38  | 84   | 57  | 29  | 59  | 129 | 93  | 0    | 33   |
| <i>Verrucomicrobia</i> | 789 | 845 | 735 | 610 | 521 | 482 | 777 | 519 | 572 | 1416 | 639 | 787 | 599 | 553 | 855 | 29   | 22   |
| <i>WS3</i>             | 11  | 3   | 9   | 4   | 4   | 10  | 1   | 2   | 2   | 2    | 9   | 4   | 11  | 7   | 1   | 0    | 0    |
| <b>Archaea</b>         |     |     |     |     |     |     |     |     |     |      |     |     |     |     |     |      |      |
| Total classified reads | 718 | 814 | 441 | 546 | 259 | 340 | 781 | 233 | 55  | 160  | 124 | 262 | 176 | 165 | 264 | 334  | 64   |
| <i>Euryarchaeota</i>   | 570 | 506 | 292 | 433 | 186 | 137 | 484 | 87  | 34  | 76   | 66  | 158 | 150 | 111 | 103 | 70   | 63   |
| <i>Crenarchaeota</i>   | 22  | 90  | 30  | 21  | 34  | 98  | 49  | 13  | 4   | 40   | 20  | 39  | 4   | 4   | 12  | 2    | 0    |

17 AR, Athabasca reference site; NSM, Northland sawmill; DSU, downstream Suncor; MSK, Muskeg River; AER, mouth of Ells River;

18 EU, EM, EL: upper, mid and lower Ells River; FU, FM, FL: upper, mid and lower Firebag Creek; SU, SM, SL: upper, mid and lower

19 Steepbank Creek; SY1A, SY1B, Syncrude tailings ponds; SU3: Suncor tailings pond.

20

21

22 Supplementary Table S3: Number of sequences among the 50 most abundant bacterial genera detected in the 454 datasets

| Taxa                                                      | AER | NSM | DSU | MSK | AR  | SU  | SM   | SL   | EU   | EM  | EL   | FU  | FM  | FL  | SU3 | SY1A | SY1B |
|-----------------------------------------------------------|-----|-----|-----|-----|-----|-----|------|------|------|-----|------|-----|-----|-----|-----|------|------|
| <i>Geobacter</i>                                          | 305 | 202 | 285 | 312 | 227 | 206 | 947  | 2388 | 2067 | 176 | 579  | 246 | 402 | 558 | 185 | 367  | 503  |
| <i>Rhodoferrax</i>                                        | 78  | 48  | 88  | 23  | 43  | 105 | 396  | 121  | 326  | 103 | 383  | 59  | 166 | 241 | 234 | 4178 | 3291 |
| <i>Smithella</i>                                          | 420 | 362 | 145 | 380 | 209 | 75  | 22   | 17   | 119  | 25  | 366  | 93  | 71  | 11  | 184 | 44   | 3247 |
| <i>Flavobacterium</i>                                     | 99  | 69  | 128 | 103 | 43  | 74  | 1248 | 835  | 487  | 104 | 1430 | 123 | 103 | 99  | 133 | 51   | 402  |
| <i>Thiobacillus</i>                                       | 142 | 300 | 172 | 59  | 173 | 71  | 190  | 72   | 188  | 157 | 631  | 33  | 0   | 16  | 276 | 2743 | 28   |
| <i>Clostridium</i>                                        | 12  | 3   | 32  | 19  | 4   | 199 | 256  | 923  | 2714 | 13  | 716  | 47  | 153 | 78  | 4   | 0    | 17   |
| <i>Acidobacteria Gp6</i>                                  | 385 | 121 | 342 | 220 | 390 | 394 | 392  | 285  | 141  | 243 | 283  | 292 | 561 | 432 | 190 | 0    | 0    |
| <i>Verrucomicrobia Subdivision3 genera incertae sedis</i> | 377 | 397 | 227 | 259 | 226 | 218 | 278  | 166  | 211  | 568 | 299  | 385 | 278 | 240 | 319 | 0    | 15   |
| <i>Acidobacteria Gp4</i>                                  | 197 | 37  | 167 | 89  | 207 | 397 | 193  | 250  | 109  | 101 | 196  | 142 | 781 | 297 | 42  | 0    | 5    |
| <i>Paludibacter</i>                                       | 60  | 38  | 41  | 61  | 43  | 47  | 435  | 487  | 1034 | 115 | 215  | 32  | 311 | 81  | 39  | 1    | 30   |
| <i>Nitrospira</i>                                         | 106 | 38  | 352 | 78  | 173 | 324 | 99   | 65   | 24   | 54  | 46   | 392 | 365 | 295 | 24  | 1    | 0    |
| <i>Gemmatimonas</i>                                       | 193 | 101 | 242 | 118 | 149 | 124 | 197  | 110  | 74   | 190 | 124  | 104 | 372 | 240 | 84  | 0    | 0    |
| <i>Leptolinea</i>                                         | 233 | 148 | 107 | 169 | 169 | 153 | 121  | 88   | 172  | 152 | 310  | 165 | 78  | 59  | 103 | 1    | 122  |
| <i>Ottowia</i>                                            | 150 | 73  | 199 | 62  | 157 | 162 | 405  | 109  | 124  | 107 | 149  | 94  | 282 | 83  | 156 | 5    | 2    |
| <i>Cyanobacteria GpIIa</i>                                | 234 | 146 | 700 | 286 | 216 | 1   | 4    | 2    | 29   | 300 | 37   | 11  | 2   | 37  | 76  | 0    | 0    |
| <i>Cyanobacteria GpI</i>                                  | 51  | 46  | 76  | 67  | 44  | 26  | 107  | 49   | 815  | 269 | 97   | 105 | 7   | 236 | 29  | 0    | 0    |
| <i>Acidobacteria Gp16</i>                                 | 148 | 72  | 298 | 102 | 142 | 442 | 132  | 102  | 65   | 43  | 86   | 77  | 90  | 84  | 44  | 0    | 0    |
| <i>Trichococcus</i>                                       | 3   | 1   | 3   | 0   | 0   | 8   | 229  | 1310 | 262  | 0   | 49   | 1   | 0   | 1   | 0   | 0    | 0    |
| <i>Salinimicrobium</i>                                    | 16  | 5   | 9   | 14  | 5   | 2   | 378  | 179  | 42   | 5   | 477  | 0   | 0   | 0   | 228 | 257  | 246  |
| <i>Arcobacter</i>                                         | 0   | 5   | 8   | 6   | 0   | 30  | 171  | 4    | 504  | 120 | 67   | 14  | 496 | 381 | 6   | 0    | 18   |
| <i>Methylibium</i>                                        | 152 | 111 | 206 | 96  | 197 | 60  | 61   | 68   | 106  | 197 | 119  | 165 | 54  | 41  | 92  | 15   | 16   |
| <i>Ideonella</i>                                          | 141 | 132 | 166 | 92  | 229 | 25  | 70   | 75   | 144  | 232 | 196  | 79  | 14  | 30  | 53  | 15   | 2    |
| <i>Longilinea</i>                                         | 161 | 102 | 134 | 136 | 102 | 166 | 65   | 50   | 66   | 94  | 215  | 142 | 44  | 46  | 80  | 0    | 14   |
| <i>Hyphomicrobium</i>                                     | 113 | 54  | 170 | 99  | 152 | 187 | 72   | 71   | 76   | 102 | 67   | 99  | 115 | 192 | 38  | 0    | 1    |
| <i>Luteolibacter</i>                                      | 97  | 165 | 157 | 109 | 48  | 27  | 153  | 107  | 131  | 155 | 53   | 53  | 9   | 53  | 182 | 21   | 0    |
| <i>Anaerolinea</i>                                        | 200 | 73  | 107 | 123 | 237 | 140 | 45   | 60   | 66   | 41  | 187  | 61  | 47  | 32  | 45  | 19   | 15   |
| <i>Wolinella</i>                                          | 59  | 482 | 12  | 9   | 34  | 5   | 10   | 2    | 24   | 4   | 142  | 13  | 29  | 4   | 258 | 127  | 211  |
| <i>Rhodoplanes</i>                                        | 57  | 5   | 96  | 33  | 45  | 184 | 54   | 44   | 19   | 25  | 22   | 51  | 330 | 263 | 6   | 0    | 0    |
| <i>Opitutus</i>                                           | 74  | 111 | 94  | 55  | 62  | 66  | 56   | 31   | 65   | 163 | 53   | 106 | 57  | 68  | 162 | 7    | 0    |
| <i>Curvibacter</i>                                        | 37  | 39  | 49  | 34  | 23  | 17  | 78   | 54   | 41   | 80  | 57   | 98  | 45  | 68  | 88  | 175  | 157  |

| Taxa                                        | AER | NSM | DSU | MSK | AR | SU  | SM  | SL  | EU  | EM  | EL  | FU  | FM  | FL  | SU3 | SY1A | SY1B |
|---------------------------------------------|-----|-----|-----|-----|----|-----|-----|-----|-----|-----|-----|-----|-----|-----|-----|------|------|
| <i>Desulforhopalus</i>                      | 27  | 94  | 355 | 37  | 72 | 31  | 65  | 18  | 81  | 30  | 113 | 44  | 2   | 73  | 64  | 0    | 0    |
| <i>Methylobacter</i>                        | 68  | 26  | 31  | 49  | 19 | 320 | 37  | 38  | 70  | 32  | 67  | 249 | 5   | 42  | 41  | 0    | 0    |
| <i>Haliea</i>                               | 74  | 81  | 124 | 67  | 92 | 11  | 43  | 34  | 46  | 119 | 44  | 109 | 3   | 57  | 106 | 18   | 0    |
| <i>Desulfuromonas</i>                       | 35  | 15  | 19  | 25  | 14 | 4   | 130 | 53  | 188 | 27  | 16  | 2   | 2   | 23  | 54  | 34   | 353  |
| <i>Terrimonas</i>                           | 55  | 36  | 106 | 68  | 89 | 28  | 32  | 59  | 50  | 63  | 118 | 51  | 151 | 15  | 28  | 0    | 0    |
| <i>Spartobacteria genera incertae sedis</i> | 56  | 20  | 46  | 36  | 45 | 43  | 68  | 102 | 52  | 120 | 89  | 58  | 143 | 42  | 23  | 0    | 0    |
| <i>TM7 genera incertae sedis</i>            | 19  | 24  | 84  | 52  | 47 | 52  | 82  | 53  | 38  | 84  | 57  | 29  | 59  | 129 | 93  | 0    | 33   |
| <i>Alistipes</i>                            | 86  | 94  | 42  | 106 | 81 | 13  | 28  | 5   | 27  | 79  | 52  | 23  | 189 | 17  | 55  | 4    | 28   |
| <i>Acidobacteria Gp7</i>                    | 101 | 18  | 75  | 31  | 82 | 131 | 120 | 57  | 67  | 14  | 63  | 12  | 89  | 45  | 16  | 0    | 0    |
| <i>Levilinea</i>                            | 106 | 67  | 70  | 86  | 96 | 22  | 28  | 57  | 46  | 39  | 95  | 24  | 37  | 30  | 28  | 0    | 62   |
| <i>Hydrogenophaga</i>                       | 8   | 3   | 8   | 4   | 6  | 0   | 50  | 10  | 44  | 15  | 23  | 7   | 1   | 38  | 395 | 135  | 144  |
| <i>Polaromonas</i>                          | 10  | 3   | 14  | 1   | 9  | 35  | 110 | 10  | 12  | 5   | 42  | 22  | 9   | 23  | 395 | 126  | 18   |
| <i>Treponema</i>                            | 95  | 35  | 26  | 68  | 39 | 4   | 15  | 8   | 12  | 39  | 23  | 11  | 316 | 16  | 35  | 5    | 87   |
| <i>Pseudomonas</i>                          | 4   | 3   | 9   | 5   | 14 | 10  | 558 | 7   | 3   | 4   | 19  | 39  | 23  | 20  | 48  | 7    | 58   |
| <i>Steroidobacter</i>                       | 47  | 26  | 85  | 32  | 66 | 21  | 28  | 18  | 39  | 27  | 21  | 46  | 305 | 25  | 35  | 3    | 0    |
| <i>Bradyrhizobium</i>                       | 25  | 7   | 33  | 22  | 23 | 123 | 27  | 36  | 18  | 8   | 10  | 57  | 265 | 126 | 4   | 0    | 0    |
| <i>Propionivibrio</i>                       | 36  | 57  | 15  | 19  | 34 | 20  | 28  | 48  | 78  | 57  | 117 | 26  | 112 | 58  | 47  | 0    | 0    |
| <i>Acidobacteria Gp17</i>                   | 80  | 26  | 60  | 44  | 63 | 89  | 50  | 42  | 35  | 17  | 38  | 37  | 76  | 53  | 18  | 0    | 0    |
| <i>Ilumatobacter</i>                        | 52  | 48  | 104 | 32  | 51 | 61  | 78  | 45  | 32  | 31  | 34  | 35  | 6   | 27  | 76  | 0    | 0    |

23 AR, Athabasca reference site; NSM, Northland sawmill; DSU, downstream Suncor; MSK, Muskeg River; AER, mouth of Ells River;

24 EU, EM, EL: upper, mid and lower Ells River; FU, FM, FL: upper, mid and lower Firebag Creek; SU, SM, SL: upper, mid and lower

25 Steepbank Creek; SY1A, SY1B, Syncrude tailings ponds; SU3: Suncor tailings pond.

26
